# Supplementary material
Source: PubMed Central journal article supplement (PMC10035585)
Supplement: NIHMS1879423-supplement-Disclosures.pdf [file NIHMS1879423-supplement-Disclosures.pdf]

Disclosure Purpose: EV-22-00014

Summary of Interests

| Company or Organization                                                                                                                                                                                                                                                                                                                                                    |       |                                           |
|----------------------------------------------------------------------------------------------------------------------------------------------------------------------------------------------------------------------------------------------------------------------------------------------------------------------------------------------------------------------------|-------|-------------------------------------------|
| Entity                                                                                                                                                                                                                                                                                                                                                                     | Type  | Interest Held By                          |
| <a href="#">Novo Nordisk</a>                                                                                                                                                                                                                                                                                                                                               | Other | Self                                      |
| <p><i>Category:</i> Other<br/> <i>Additional Information:</i> Site principal investigator and enrolled participants for NN8022-4392 - Effect and safety of liraglutide 3.0 mg on weight management in children with obesity aged 6 to &lt;12 years: 56-week, double-blind, randomized, placebo-controlled trial, Phase 3a. Funds were paid directly to my institution.</p> |       | <p><i>Description:</i> Clinical Trial</p> |
| <a href="#">VIVUS, Inc.</a>                                                                                                                                                                                                                                                                                                                                                | Other | Self                                      |
| <p><i>Category:</i> Other<br/> <i>Additional Information:</i> Site principal investigator and enrolled participants for this trial "Phentermine/Topiramate Extended Release for the Treatment of Adolescent Obesity: A Randomized, Placebo-Controlled Trial." Funds were paid directly to my institution.</p>                                                              |       | <p><i>Description:</i> Clinical Trial</p> |

Certification

I certify that the information provided in this disclosure is complete and accurate.

Disclosure Purpose: EV-22-00014

## Summary of Interests

### Company or Organization

| Entity                                                                                                                                                                             | Type             | Interest Held By                                                                |
|------------------------------------------------------------------------------------------------------------------------------------------------------------------------------------|------------------|---------------------------------------------------------------------------------|
| <a href="#">AstraZeneca</a>                                                                                                                                                        | Grant / Contract | Self                                                                            |
| <i>Recipient Name:</i> Aaron Kelly<br><i>Grant / Contract Description:</i> Provision of drug and placebo for NIDDK-funded clinical trial<br><i>Additional Information:</i>         |                  | <i>Recipient Type:</i> Institution<br><i>Grant / Contract Purpose:</i> Research |
| <a href="#">Boehringer Ingelheim</a>                                                                                                                                               | Consultant       | Self                                                                            |
| <i>Category:</i> Consultant<br><i>Additional Information:</i>                                                                                                                      |                  | <i>Description:</i> Unpaid Consultant                                           |
| <a href="#">Eli Lilly and Company</a>                                                                                                                                              | Consultant       | Self                                                                            |
| <i>Category:</i> Consultant<br><i>Additional Information:</i>                                                                                                                      |                  | <i>Description:</i> Unpaid consultant                                           |
| <a href="#">Novo Nordisk</a>                                                                                                                                                       | Consultant       | Self                                                                            |
| <i>Category:</i> Consultant<br><i>Additional Information:</i> I am not certain about the start date. I believe it was prior to 2018 but the dropdown only allows out to 2018.      |                  | <i>Description:</i> Unpaid consultant (only travel expenses)                    |
| <a href="#">Orexigen Therapeutics, Inc.</a>                                                                                                                                        | Consultant       | Self                                                                            |
| <i>Category:</i> Consultant<br><i>Additional Information:</i> I am uncertain about the start date but believe it was prior to 2018. However, the dropdown only allows out to 2018. |                  | <i>Description:</i> Unpaid consultant                                           |
| <a href="#">VIVUS, Inc.</a>                                                                                                                                                        | Grant / Contract | Self                                                                            |
| <i>Recipient Name:</i> Aaron Kelly<br><i>Grant / Contract Description:</i> Donated drug/placebo for NIDDK-funded clinical trial<br><i>Additional Information:</i>                  |                  | <i>Recipient Type:</i> Institution<br><i>Grant / Contract Purpose:</i> Research |
| <a href="#">VIVUS, Inc.</a>                                                                                                                                                        | Consultant       | Self                                                                            |
| <i>Category:</i> Consultant<br><i>Additional Information:</i> I am uncertain about the start date but believe it was prior to 2018. However, the dropdown only allows out to 2018. |                  | <i>Description:</i> Unpaid consultant                                           |
| <a href="#">WW (formerly Weight Watchers)</a>                                                                                                                                      | Consultant       | Self                                                                            |
| <i>Category:</i> Consultant<br><i>Additional Information:</i> I am uncertain about the start date but believe it was prior to 2018. However, the dropdown only allows out to 2018. |                  | <i>Description:</i> Unpaid consultant                                           |

## Certification

I certify that the information provided in this disclosure is complete and accurate.

# Megan Oberle

Mar 16, 2022 15:45:48 EDT  
NEJM Evidence

**Disclosure Purpose:** EV-22-00014

## Summary of Interests

I do not have any interests to disclose at this time.

## Certification

I certify that the information provided in this disclosure is complete and accurate.

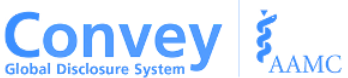

Disclosure Purpose: EV-22-00014

Summary of Interests

**Company or Organization**

| Entity                                        | Type       | Interest Held By                                                                                                         |
|-----------------------------------------------|------------|--------------------------------------------------------------------------------------------------------------------------|
| VIVUS, Inc.                                   | Employment | Self                                                                                                                     |
| <i>Title:</i> Sr. Director, Clinical Research |            | <i>Position Description:</i> Oversaw design, operational conduct, and reporting of clinical trials sponsored by company. |
| <i>Additional Information:</i>                |            |                                                                                                                          |

Certification

I certify that the information provided in this disclosure is complete and accurate.

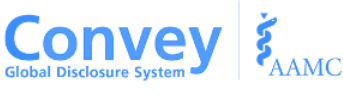

Disclosure Purpose: EV-22-00014

Summary of Interests

**Company or Organization**

| Entity                                                                                  | Type       | Interest Held By             |
|-----------------------------------------------------------------------------------------|------------|------------------------------|
| VIVUS LLC                                                                               | Employment | Self                         |
| <i>Title:</i> Associate Director, Clinical Operations<br><i>Additional Information:</i> |            | <i>Position Description:</i> |

Certification

I certify that the information provided in this disclosure is complete and accurate.

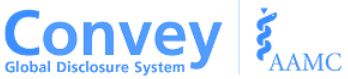

**Disclosure Purpose:** EV-22-00014

## Summary of Interests

| Company or Organization                                                                                                                                                                                      |                  |                                                                                                                       |
|--------------------------------------------------------------------------------------------------------------------------------------------------------------------------------------------------------------|------------------|-----------------------------------------------------------------------------------------------------------------------|
| Entity                                                                                                                                                                                                       | Type             | Interest Held By                                                                                                      |
| <a href="#">AstraZeneca</a>                                                                                                                                                                                  | Grant / Contract | Self                                                                                                                  |
| <i>Recipient Name:</i> Vanderbilt University Medical Center<br><i>Grant / Contract Description:</i> Provided drug/placebo for an NIH funded study<br><i>Additional Information:</i>                          |                  | <i>Recipient Type:</i> Institution<br><i>Grant / Contract Purpose:</i> Research                                       |
| <a href="#">Radius Health, Inc.</a>                                                                                                                                                                          | Consultant       | Self                                                                                                                  |
| <i>Category:</i> Consultant<br><i>Additional Information:</i> One advisory board meeting in 2021, no ongoing involvement                                                                                     |                  | <i>Description:</i> Served as a scientific advisor for development of a hypothalamic obesity clinical trial           |
| <a href="#">Rhythm Pharmaceuticals</a>                                                                                                                                                                       | Grant / Contract | Self                                                                                                                  |
| <i>Recipient Name:</i> Vanderbilt University Medical Center<br><i>Grant / Contract Description:</i> Site PI for clinical trial in genetic obesity and hypothalamic obesity<br><i>Additional Information:</i> |                  | <i>Recipient Type:</i> Institution<br><i>Grant / Contract Purpose:</i> Research                                       |
| <a href="#">Rhythm Pharmaceuticals</a>                                                                                                                                                                       | Consultant       | Self                                                                                                                  |
| <i>Category:</i> Consultant<br><i>Additional Information:</i> Consulted on development of a genetic obesity screening program and hypothalamic obesity clinical trial. Average 5 hours per year.             |                  | <i>Description:</i> Scientific advisor                                                                                |
| <a href="#">Rhythm Pharmaceuticals</a>                                                                                                                                                                       | Other            | Self                                                                                                                  |
| <i>Category:</i> Other<br><i>Additional Information:</i>                                                                                                                                                     |                  | <i>Description:</i> Speaker on Bardet Biedl Syndrome (patient and provider disease education, no product discussions) |
| <a href="#">Saniona A/S</a>                                                                                                                                                                                  | Consultant       | Self                                                                                                                  |
| <i>Category:</i> Consultant<br><i>Additional Information:</i> Advising on clinical trial study design for upcoming clinical trial. Approx. 5 hours per year.                                                 |                  | <i>Description:</i> Hypothalamic Obesity Scientific Advisory Board                                                    |
| <a href="#">Soleno</a>                                                                                                                                                                                       | Grant / Contract | Self                                                                                                                  |
| <i>Recipient Name:</i> Vanderbilt University Medical Center<br><i>Grant / Contract Description:</i> Site PI for clinical trial in Prader-Willi syndrome<br><i>Additional Information:</i>                    |                  | <i>Recipient Type:</i> Institution<br><i>Grant / Contract Purpose:</i> Research                                       |
| <a href="#">Vivus</a>                                                                                                                                                                                        | Grant / Contract | Self                                                                                                                  |
| <i>Recipient Name:</i> Vanderbilt University Medical Center<br><i>Grant / Contract Description:</i> Site PI for clinical trial<br><i>Additional Information:</i>                                             |                  | <i>Recipient Type:</i> Institution<br><i>Grant / Contract Purpose:</i> Research                                       |

## Certification

I certify that the information provided in this disclosure is complete and accurate.

**Disclosure Purpose:** EV-22-00014

## Summary of Interests

| Company or Organization                                        |            |                                                                                                                                                                         |
|----------------------------------------------------------------|------------|-------------------------------------------------------------------------------------------------------------------------------------------------------------------------|
| Entity                                                         | Type       | Interest Held By                                                                                                                                                        |
| <a href="#">VIVUS, Inc.</a>                                    | Employment | Self                                                                                                                                                                    |
| <i>Title:</i> Senior Vice President, Chief Medical Officer     |            | <i>Position Description:</i> Responsible for Clinical Development, Medical Affairs, Pharmacovigilance, Regulatory Affairs, Quality Assurance, and Regulatory Compliance |
| <i>Additional Information:</i> Salaried Officer of the company |            |                                                                                                                                                                         |

## Certification

I certify that the information provided in this disclosure is complete and accurate.
