# Supplementary material
Source: PubMed Central journal article supplement (PMC10035585)
Supplement: NIHMS1879423-supplement-Supplementary_Materials.pdf [file NIHMS1879423-supplement-Supplementary_Materials.pdf]

## **Supplementary Appendix**

This appendix has been provided by the authors to give readers additional information about their work.

Supplement to: Aaron S. Kelly, Megan O. Bensignor, Daniel S. Hsia, et al.  
Phentermine/Topiramate for the Treatment of Adolescent Obesity. NEJM Evidence.  
DOI: 10.1056/EVIDoa2200014.

## Supplementary Appendix

|                                                            |    |
|------------------------------------------------------------|----|
| List of Investigators and Study Sites                      | 2  |
| Data Monitoring Committee Members                          | 4  |
| Inclusion/Exclusion Criteria                               | 5  |
| Study Drug Dose Titration                                  | 7  |
| Table S1. Representativeness of Study Participants         | 8  |
| Table S2. Characteristics of Completers vs. Non-Completers | 9  |
| Table S3. Serious Adverse Events                           | 10 |
| Table S4. Events Related to Psychiatric Disorders          | 11 |

## List of Investigators and Study Sites

| Site No. | Investigator Name                      | Address                                                                                                                                                          |
|----------|----------------------------------------|------------------------------------------------------------------------------------------------------------------------------------------------------------------|
| 101      | Adil Aryaman Fatakia                   | Tandem Clinical Research, LLC<br>1111 Medical Center Boulevard N502<br>Marrero, LA 70072                                                                         |
| 102      | Derek Muse                             | Highland Clinical Research<br>4460 South Highland Drive, #410<br>Salt Lake City, UT 84124                                                                        |
| 103      | Ashley Shoemaker                       | VUMC - Monroe Carell Jr. Children's Hospital -<br>Endocrinology Clinic<br>1500 21st Avenue South<br>8410 Medical Center East, South Tower<br>Nashville, TN 37232 |
| 104      | Daniel Hsia                            | Pennington Biomedical Research Center<br>6400 Perkins Road<br>Baton Rouge, LA 70808-4124                                                                         |
| 105      | Tollie Elliott                         | Emerson Clinical Research Institute<br>508 Kennedy Street NW, Suite 306<br>Washington, DC 20011-3010                                                             |
| 107      | Eli Shalenberg                         | Richmond Behavioral Associates<br>4349 Hylan Boulevard<br>Staten Island, NY 10312-6501                                                                           |
| 108      | John Kirby                             | Summit Medical Group - Tennessee Valley Primary Care<br>120 Hospital Drive, Suite 130<br>Jefferson City, TN 37760-5279                                           |
| 109      | Corey Anderson                         | Clinical Research Consortium- Tempe<br>2737 W Baseline Road, Suite 19<br>Tempe, AZ 85283-1051                                                                    |
| 111      | Lisa Connery                           | Intend Research<br>1010 24th Avenue NW, Suite 110<br>Norman, OK 73069                                                                                            |
| 112      | Megan Oberle<br>Bensignor, Aaron Kelly | University of Minnesota - Center for Pediatric Obesity<br>Medicine<br>717 Delaware Street SE<br>Minneapolis, MN 55414-2903                                       |
| 113      | Richard Egelhof                        | Heartland Clinical Research<br>3730 N Ridge Road, Suite 600<br>Wichita, KS 67205-1235                                                                            |
| 114      | Mark Adams                             | Central Kentucky Research Associates<br>3475 Richmond Road, 3rd Floor<br>Lexington, KY 40509                                                                     |
| 115      | Khozema Palanpurwala                   | DM Clinical Research<br>13406 Medical Complex Drive Suite 53<br>Tomball, TX 77375                                                                                |

| <b>Site No.</b> | <b>Investigator Name</b> | <b>Address</b>                                                                                                   |
|-----------------|--------------------------|------------------------------------------------------------------------------------------------------------------|
| 116             | Joe Pouzar               | Centex Studies, Inc. – Houston<br>1045 Gemini Street, Suite 200A<br>Houston, TX 77058-2705                       |
| 120             | George Freeman           | Health Research of Hampton Roads, Inc.<br>720 Thimble Shoals Boulevard Suite 110<br>Newport News, VA 23606       |
| 123             | Michelle Galen           | Deaconess Clinic - Gateway Health Center<br>4233 Gateway Boulevard<br>Newburgh, IN 47630-8900                    |
| 124             | William Smith            | New Orleans Center for Clinical Research (NOCCR), Inc.<br>1928 Alcoa Highway, Suite 107<br>Knoxville, TN 37920   |
| 125             | Michael Jacobs           | Clinical Research Consortium (CRC) - Nevada Location <br>2110 E. Flamingo Road, Suite 119<br>Las Vegas, NV 89119 |
| 126             | Austina Cho              | Advanced Research Center – Anaheim<br>1020 S Anaheim Blvd Ste 316<br>Anaheim, CA 92805-5854                      |
| 129             | Joel Solis               | Centex Studies, Inc. – McAllen<br>1020 Zinnia Avenue<br>McAllen, TX 78504                                        |

## Data Monitoring Committee Members

---

|                 |                  |                                                                                                                       |
|-----------------|------------------|-----------------------------------------------------------------------------------------------------------------------|
| DMC Chairperson | Name             | Gary Cutter                                                                                                           |
|                 | Title            | Professor of Biostatistics Research Methods and Clinical Trials                                                       |
|                 | Address          | Department of Biostatistics<br>403b Ryals Public Health Building<br>1665 University Boulevard<br>Birmingham, AL 35294 |
|                 | email            | cutterg@prodigy.net<br>cutterg@uab.edu                                                                                |
|                 | Telephone Number | 205-975-5048                                                                                                          |

---

|            |                  |                                                                                                                                                                                                 |
|------------|------------------|-------------------------------------------------------------------------------------------------------------------------------------------------------------------------------------------------|
| DMC Member | Name             | John Paul Foreyt                                                                                                                                                                                |
|            | Title            | Professor, Departments of Medicine and Psychiatry and Behavioral Sciences<br>Director, Behavioral Medicine Research Center<br>Baylor College of Medicine<br>Behavioral Medicine Research Center |
|            | Address          | 6655 Travis St., Suite 320<br>Houston, Texas 77030                                                                                                                                              |
|            | email            | jforeyt@bcm.edu                                                                                                                                                                                 |
|            | Telephone Number | (713) 798 3839                                                                                                                                                                                  |

---

|            |                  |                                                                                                                |
|------------|------------------|----------------------------------------------------------------------------------------------------------------|
| DMC Member | Name             | Alberta S. Kong                                                                                                |
|            | Title            | Professor and Chief<br>Division of Adolescent Medicine<br>Department of Pediatrics<br>Department of Pediatrics |
|            | Address          | MSC 10 5590, 1 University of New Mexico<br>Albuquerque, NM 87131-0001                                          |
|            | email            | AKong@salud.unm.edu                                                                                            |
|            | Telephone Number | 505-925-7600                                                                                                   |

---

## **Inclusion and Exclusion Criteria**

### Inclusion Criteria

Participants who met all of the following criteria as stated in the protocol were included in the study:

- Provided written informed consent (of a parent or legal guardian) who accompanied the subject to all study visits
- Provided written assent (of study participant)
- Was an adolescent  $\geq 12$  years and  $< 17$  years of age with Tanner Staging of  $\geq 2$  at the time of screening
- Had a BMI  $\geq$  the 95<sup>th</sup> percentile of BMI for age and gender with documented history of failure to lose sufficient weight or failure to maintain weight loss in a lifestyle modification program
- Was willing and able to comply with scheduled study visits, treatment plan, laboratory tests, and other study procedures
- If female, must have been using adequate contraception, defined as double barrier methods, stable hormonal contraception plus single barrier method, tubal ligation, or abstinence

### Exclusion Criteria

Participants who met any of the following criteria as stated in the protocol were excluded from the study:

- Weight gain or weight loss of greater than 5 kg, use of a supervised fast or very low calorie diet within the past 3 months
- Treatment with phentermine, topiramate, lorcaserin, naltrexone hydrochloride /bupropion hydrochloride, any over the counter or prescription or herbal agents and dietary supplements, teas or tinctures used with the intention to lose body weight within 3 months of screening
- Any stimulants used for treatment of attention-deficit/hyperactivity disorder within 3 months of screening
- Condition or disease interfering with metabolism, such as untreated hypothyroidism, Cushing's syndrome
- Pulmonary disorders (other than asthma not requiring continuous medication or sleep apnea-related disorders)
- Type 1 diabetes or any medical treatment with insulin, sulfonylureas, glucagon-like peptide-1 (GLP-1) agonists, sodium glucose transporter (SGLT)-1 inhibitors, and SGLT 2 inhibitors
- Congenital heart disease
- Clinically significant arrhythmia or ECG abnormality
- Screening laboratory values as specified (tests could have been repeated per Investigator's discretion):
  - Bicarbonate  $<$  lower limit of normal

- Aspartate aminotransferase and alanine aminotransferase  $> 3 \times$  upper limit of normal (ULN)
- Hemoglobin A1c  $\geq 8.0\%$
- Fasting glucose  $\geq 270$  mg/dL
- Triglyceride  $\geq 400$  mg/dL
- Creatinine clearance  $< 60$  mL/minute (Schwartz Formula)
- Thyroid stimulating hormone  $> 1.5$  ULN
- Clinically significant hepatic or renal disease
- Clinically significant thyroid dysfunction as evidenced by signs or symptoms of hypothyroidism, a thyroid stimulating hormone  $> 1.5 \times$  ULN, or use of thyroid hormone treatment that had not been stable for at least 3 months
- Systolic blood pressure  $> 140$  mmHg, diastolic blood pressure  $> 90$  mmHg, or concurrent antihypertensive medication that had not been stable for 3 months
- Any history of bipolar disorder or psychosis, greater than one lifetime episode of major depressive disorder, current depression of moderate or greater severity (PHQ-9 score of 10 or more), presence or history of suicidal behavior or ideation with some intent to act on it; tricyclic antidepressants, monoamine oxidase inhibitors (MAOI), lithium, levodopa, and dopamine receptor agonists; or allowed antidepressant use that had not been stable for at least 3 months
- Use of chronic systemic glucocorticoid therapy (i.e., glucocorticoids, anabolic steroids) or any other steroid hormone therapy other than oral contraceptives that had not been stable for at least 3 months
- Pregnancy or breastfeeding
- Any history of eating disorders (e.g., bulimia; binge eating disorder; anorexia)
- Any history of laxative abuse
- History of glaucoma, use of carbonic anhydrase inhibitors, history of increased intraocular pressure or any past or present use of medications to treat increased intraocular pressure
- Prior bariatric surgery
- Any history of nephrolithiasis
- Any history of epilepsy, or requirement for anticonvulsants used for treatment of seizure disorder, including barbiturates, benzodiazepines, gamma-aminobutyric acid analogues, hydantoin, phenyltriazines, succinimides, and other agents (valproic acid and its derivatives, carbamazepine and its derivatives, zonisamide, and felbamate)
- Positive urine drug screen
- Current smoker or smoking cessation within 3 months of screening
- Obesity of a known genetic or endocrine origin, such as Prader Willi Syndrome
- Known allergy or hypersensitivity to phentermine or topiramate or history of anaphylaxis to any drug
- Use of any investigational medication or device for any indication or participation in a clinical study within 30 days prior to screening
- Other clinically significant medical or psychiatric condition or laboratory abnormality that could increase the risk associated with trial participation or investigational product administration or may interfere with the interpretation of trial results and, in the judgment of the Investigator, would make the subject inappropriate for entry into this trial

## Study Drug Dose Titration

The titration schema is consistent with the current labeling for Qsymia® (VI-0521), which recommends that patients titrate up to the PHEN/TPM 7.5 mg/46 mg dose for a period of 12 weeks prior to initiating possible titration up to the PHEN/TPM 15 mg/92 mg dose. For this study, however, all participants randomized to the PHEN/TPM 15 mg/92 mg dose were required to attempt titration up to that dose at the Week 12 visit.

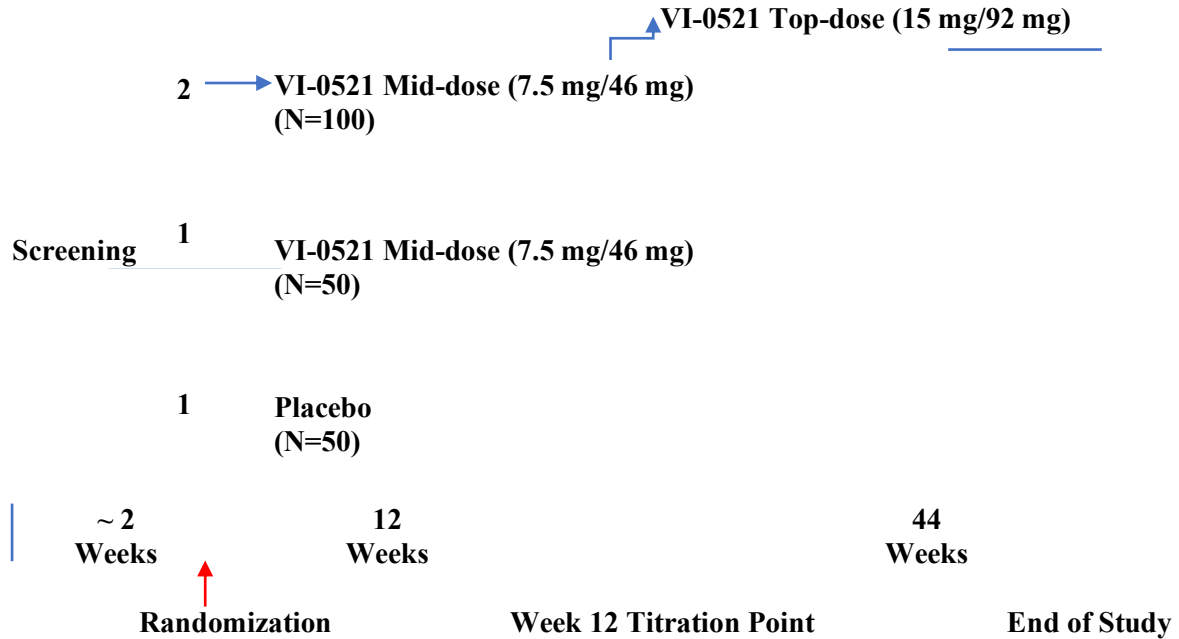

| Group            | Treatment Dosage For PHEN/TPM (mg) | Titration Dose for PHEN/TPM (mg) |           |             |             |
|------------------|------------------------------------|----------------------------------|-----------|-------------|-------------|
|                  |                                    | Weeks 1-2                        | Weeks 3-4 | Weeks 13-14 | Weeks 15-16 |
| Placebo          | 0/0                                | 0/0                              | 0/0       | 0/0         | 0/0         |
| VI-0521 Mid-dose | 7.5/46                             | 3.75/23                          | 7.5/46    | 7.5/46      | 7.5/46      |
| VI-0521 Top-dose | 15/92                              | 3.75/23                          | 7.5/46    | 11.25/69    | 15/92       |



**Table S1. Representativeness of Study Participants**

|                                           |                                                                                                                                                                                                                                                                                                            |
|-------------------------------------------|------------------------------------------------------------------------------------------------------------------------------------------------------------------------------------------------------------------------------------------------------------------------------------------------------------|
| Disease under investigation:              | Adolescent obesity                                                                                                                                                                                                                                                                                         |
| Special considerations related to:        |                                                                                                                                                                                                                                                                                                            |
| Sex and gender                            | Roughly equivalent prevalence of obesity in boys and girls                                                                                                                                                                                                                                                 |
| Age                                       | Prevalence of obesity is approximately 20% among United States adolescents ages 12-18 years old                                                                                                                                                                                                            |
| Race/ethnicity                            | Obesity prevalence is higher among African American and Hispanic/Latino adolescents as compared to Non-Hispanic White adolescents                                                                                                                                                                          |
| Geography                                 | In the United States, the prevalence of adolescent obesity is generally the highest in the Southeast region                                                                                                                                                                                                |
| Overall representativeness of this trial: | The participants in the present trial demonstrated the expected ratio of girls and boys. Sex identification was reported by the participants; they were asked to select either male or female. African American (~27%) and Hispanic/Latino (~32%) representation was relatively high in the present trial. |

**Table S2. Characteristics of Completers vs. Non-Completers**

|                                                 | <b>Study Completers</b> | <b>Study Non-Completers</b> |
|-------------------------------------------------|-------------------------|-----------------------------|
|                                                 | (N = 139)               | (N = 84)                    |
| <b>Age at Screening (Years)</b>                 |                         |                             |
| Mean (SD)                                       | 14.1 (1.33)             | 13.8 (1.37)                 |
| Median                                          | 14.0                    | 14.0                        |
| Min, Max                                        | 12, 16                  | 12, 16                      |
| <b>Sex, n (%)</b>                               |                         |                             |
| Female                                          | 71 (51.1)               | 50 (59.5)                   |
| Male                                            | 68 (48.9)               | 34 (40.5)                   |
| <b>Race, n (%)</b>                              |                         |                             |
| White                                           | 100 (71.9)              | 49 (58.3)                   |
| Black or African American                       | 28 (20.1)               | 32 (38.1)                   |
| Other                                           | 9 (6.5)                 | 3 (3.6)                     |
| American Indian or Alaska Native                | 1 (0.7)                 | 0                           |
| Asian                                           | 1 (0.7)                 | 0                           |
| Native Hawaiian or Other Pacific Islander       | 0                       | 0                           |
| <b>Ethnicity, n (%)</b>                         |                         |                             |
| Hispanic or Latino                              | 44 (31.7)               | 28 (33.3)                   |
| Not Hispanic or Latino                          | 94 (67.6)               | 55 (65.5)                   |
| Not Stated                                      | 1 (0.7)                 | 1 (1.2)                     |
| Unknown                                         | 0                       | 0                           |
| <b>Weight (kg)</b>                              |                         |                             |
| Mean (SD)                                       | 105.30 (21.804)         | 107.41 (26.584)             |
| Median                                          | 101.70                  | 102.90                      |
| Min, Max                                        | 58.8, 175.1             | 61.4, 217.8                 |
| <b>Height (cm)</b>                              |                         |                             |
| Mean (SD)                                       | 167.12 (8.257)          | 167.00 (7.148)              |
| Median                                          | 167.00                  | 166.40                      |
| Min, Max                                        | 147.6, 190.7            | 149.4, 184.2                |
| <b>Body Mass Index (BMI) (kg/m<sup>2</sup>)</b> |                         |                             |
| Mean (SD)                                       | 37.55 (6.512)           | 38.27 (7.970)               |
| Median                                          | 36.10                   | 36.60                       |
| Min, Max                                        | 26.6, 62.9              | 27.2, 72.4                  |
| <b>Waist Circumference (cm)</b>                 |                         |                             |
| Mean (SD)                                       | 114.74 (15.977)         | 112.86 (15.882)             |
| Median                                          | 113.00                  | 111.65                      |
| Min, Max                                        | 84.5, 165.0             | 81.8, 157.0                 |

**Table S3. Serious Adverse Events****Summary of Serious Adverse Events by System Organ Class and Preferred Term, Safety Population**

| <b>System Organ Class<br/>Preferred Term</b> | <b>Placebo<br/>(N = 56)<br/>n (%)</b> | <b>VI-0521<br/>Mid-dose<br/>(N = 54)<br/>n (%)</b> | <b>VI-0521<br/>Top-dose<br/>(N = 113)<br/>n (%)</b> | <b>Overall<br/>(N = 223)<br/>n (%)</b> |
|----------------------------------------------|---------------------------------------|----------------------------------------------------|-----------------------------------------------------|----------------------------------------|
| Any Serious Adverse Event                    | 0                                     | 0                                                  | 2 (1.8)                                             | 2 (0.9)                                |
| Hepatobiliary disorders                      | 0                                     | 0                                                  | 1 (0.9)                                             | 1 (0.4)                                |
| Bile duct stone                              | 0                                     | 0                                                  | 1 (0.9)                                             | 1 (0.4)                                |
| Psychiatric disorders                        | 0                                     | 0                                                  | 1 (0.9)                                             | 1 (0.4)                                |
| Depression                                   | 0                                     | 0                                                  | 1 (0.9)                                             | 1 (0.4)                                |
| Suicidal ideation                            | 0                                     | 0                                                  | 1 (0.9)                                             | 1 (0.4)                                |

VI-0521 Mid-dose = PHEN/TPM 7.5 mg/46 mg; VI-0521 Top-dose = PHEN/TPM 15 mg/92 mg

The denominator for percentages is the number of subjects in the safety population.

MedDRA Dictionary (Version 23.1) was used for coding.

If a subject experienced more than one episode of an adverse event, the subject is counted only once within a preferred term. If a subject experienced more than one adverse event within a system organ class, the subject is counted once for each preferred term and once for the system organ class.

**Table S4. Events Related to Psychiatric Disorders**

**Summary of Treatment-emergent Adverse Events from the SOC Psychiatric Disorders, Safety Population**

| System Organ Class<br>Preferred Term | Placebo<br>(N = 56)<br>n (%) |         | VI-0521<br>Mid-dose<br>(N = 54)<br>n (%) |         | VI-0521<br>Top-dose<br>(N = 113)<br>n (%) |         | Overall<br>(N = 223)<br>n (%) |         |
|--------------------------------------|------------------------------|---------|------------------------------------------|---------|-------------------------------------------|---------|-------------------------------|---------|
|                                      | Any                          | Related | Any                                      | Related | Any                                       | Related | Any                           | Related |
| Psychiatric disorders                | 1 (1.8)                      | 0       | 4 (7.4)                                  | 3 (5.6) | 10 (8.8)                                  | 4 (3.5) | 15 (6.7)                      | 7 (3.1) |
| Adjustment disorder                  | 0                            | 0       | 0                                        | 0       | 1 (0.9)                                   | 0       | 1 (0.4)                       | 0       |
| Agitation                            | 0                            | 0       | 0                                        | 0       | 1 (0.9)                                   | 1 (0.9) | 1 (0.4)                       | 1 (0.4) |
| Anxiety                              | 0                            | 0       | 1 (1.9)                                  | 0       | 3 (2.7)                                   | 1 (0.9) | 4 (1.8)                       | 1 (0.4) |
| Depression                           | 0                            | 0       | 1 (1.9)                                  | 0       | 5 (4.4)                                   | 1 (0.9) | 6 (2.7)                       | 1 (0.4) |
| Generalised anxiety disorder         | 1 (1.8)                      | 0       | 0                                        | 0       | 0                                         | 0       | 1 (0.4)                       | 0       |
| Insomnia                             | 0                            | 0       | 1 (1.9)                                  | 1 (1.9) | 2 (1.8)                                   | 1 (0.9) | 3 (1.3)                       | 2 (0.9) |
| Irritability                         | 0                            | 0       | 1 (1.9)                                  | 1 (1.9) | 0                                         | 0       | 1 (0.4)                       | 1 (0.4) |
| Mood altered                         | 0                            | 0       | 0                                        | 0       | 1 (0.9)                                   | 1 (0.9) | 1 (0.4)                       | 1 (0.4) |
| Mood swings                          | 0                            | 0       | 1 (1.9)                                  | 1 (1.9) | 0                                         | 0       | 1 (0.4)                       | 1 (0.4) |
| Suicidal ideation                    | 0                            | 0       | 0                                        | 0       | 1 (0.9)                                   | 1 (0.9) | 1 (0.4)                       | 1 (0.4) |

Abbreviations: SOC = System Organ Class; VI-0521 Mid-dose = PHEN/TPM 7.5 mg/46 mg; VI-0521 Top-dose = PHEN/TPM 15 mg/92 mg

The denominator for percentages is the number of subjects in the safety population.

MedDRA Dictionary (Version 23.1) was used for coding.

If a subject experienced more than one episode of an adverse event, the subject is counted only once within a preferred term. If a subject experienced more than one adverse event within a system organ class, the subject is counted once for each preferred term and once for the system organ class.
